# Supplementary material
Source: PubMed Central journal article supplement (PMC3086478)
Supplement: NIHMS130161-supplement-3_si_003.pdf [file NIHMS130161-supplement-3_si_003.pdf]

**Supplementary Figure 1:** Data-dependent (GPF) versus data-independent (PACIFIC) peptide properties comparison (peptide molecular weight, peptide pI, peptide amino acid composition and “proteotypic” peptide score).

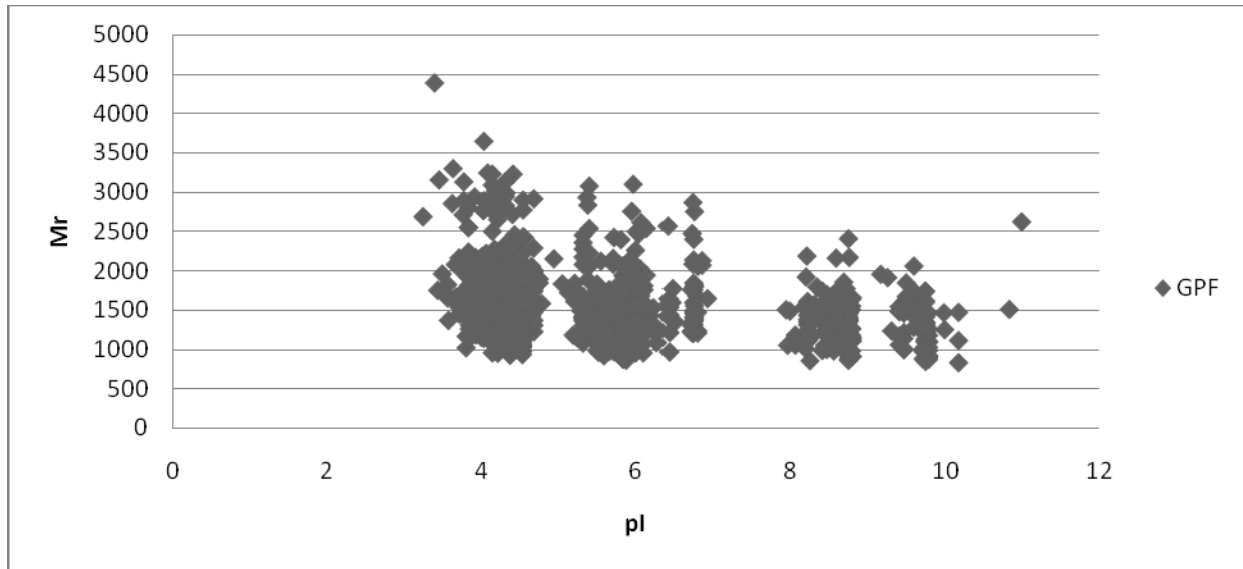

Molecular weight and pI distribution for GPF (n=1439)

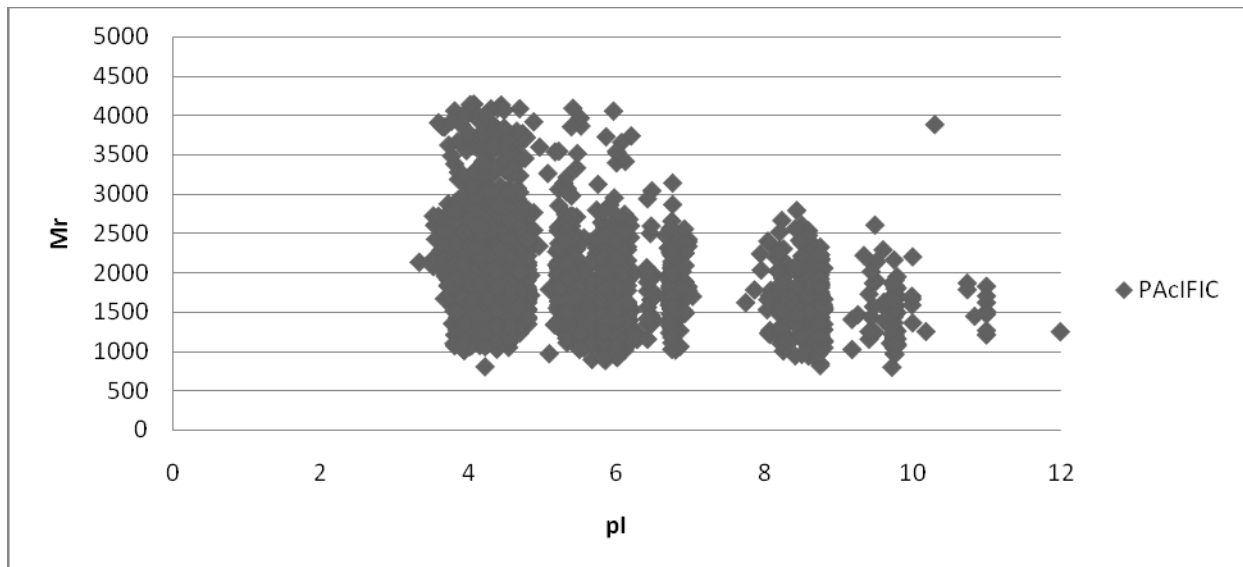

Molecular weight and pI distribution for PACIFIC (n=3388)

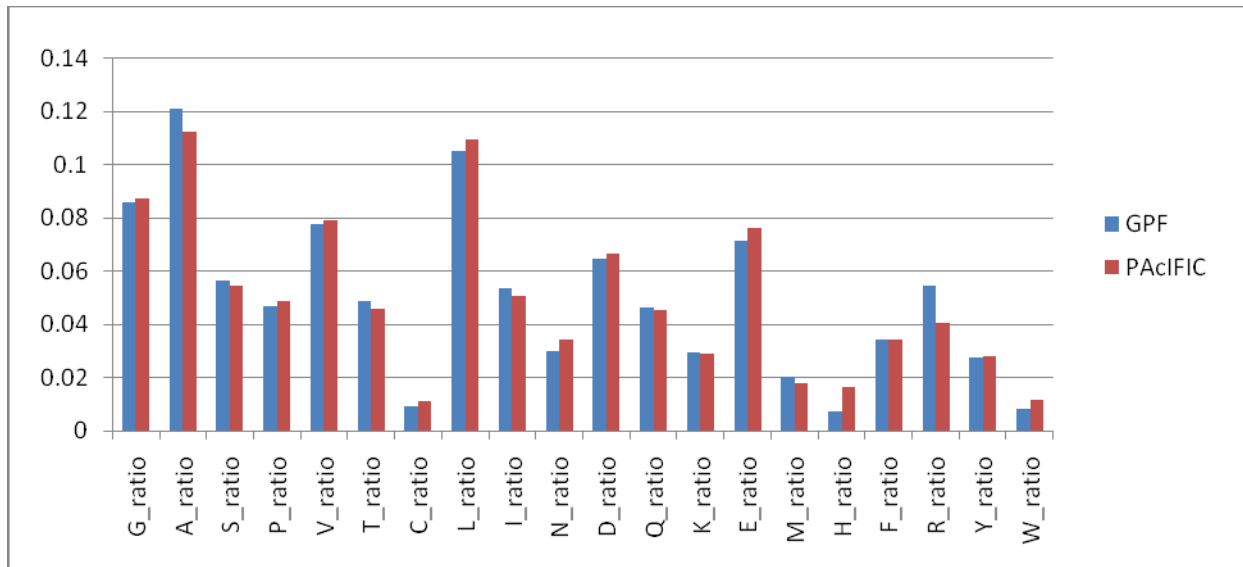

Normalized amino acid distribution (in percent) between data-dependent GPF and data-independent PACIFIC

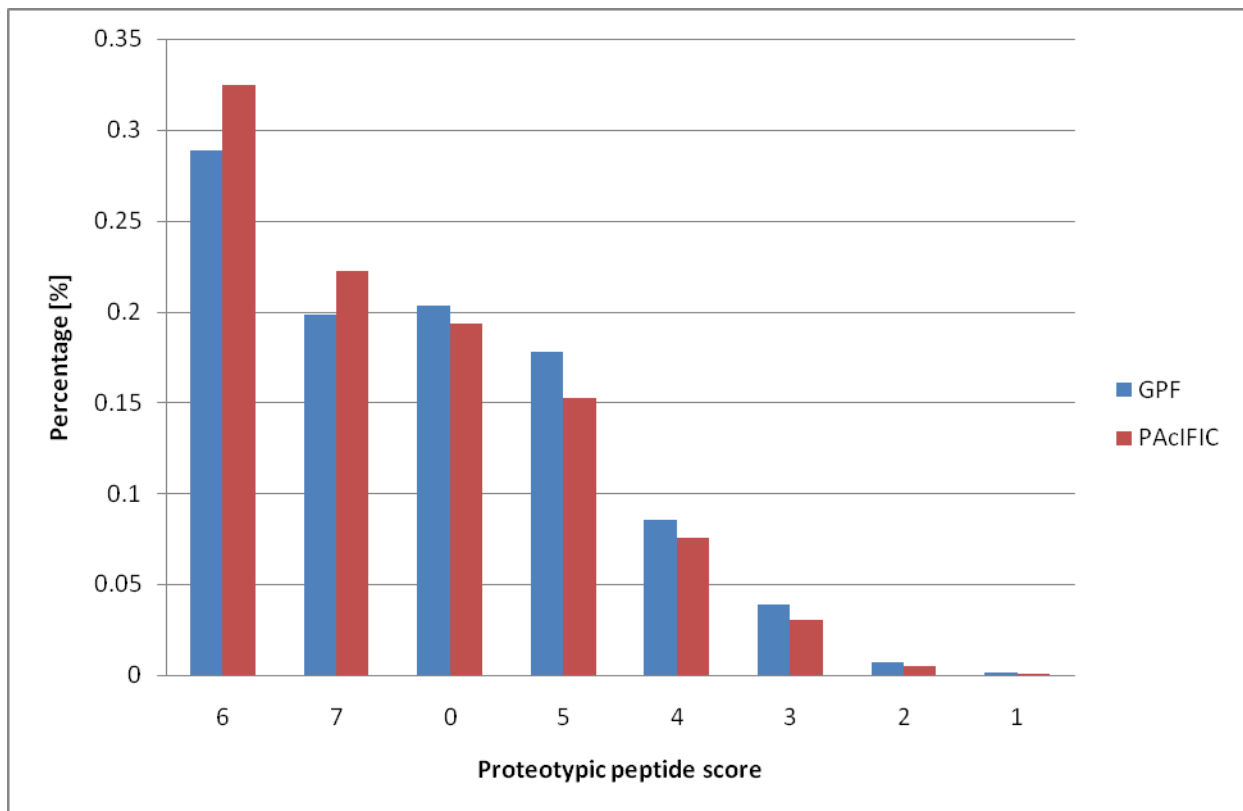

Proteotypic peptide score distribution as defined in Scherl et al., *Anal. Chem.* 2008, 80(4), 1182-1191.
