# Supplementary material
Source: PubMed Central journal article supplement (PMC3086478)

**Supplementary Figure 2:** Typical sensitivity/error plots outputted by PeptideProphet for both data-dependent (GPF) and data-independent (PACIFIC) analysis for both *Pseudomonas* and plasma data sets.

Pseudomonas PACIFIC: sensitivity & error rates plot

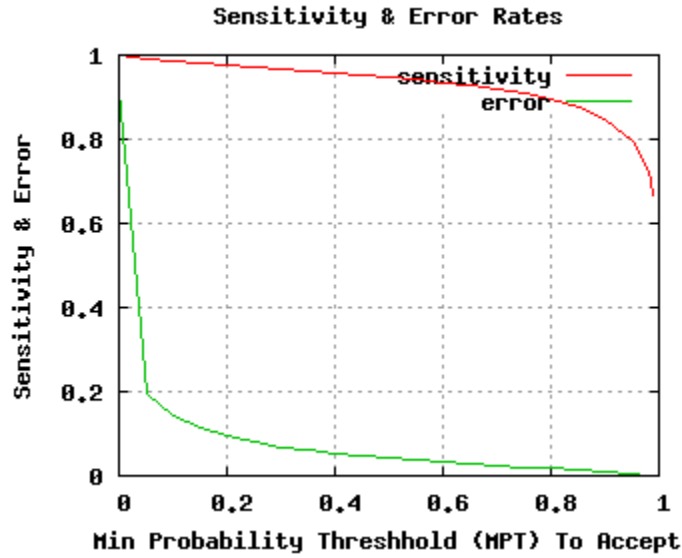

Plasma PACIFIC: sensitivity & error rates plot

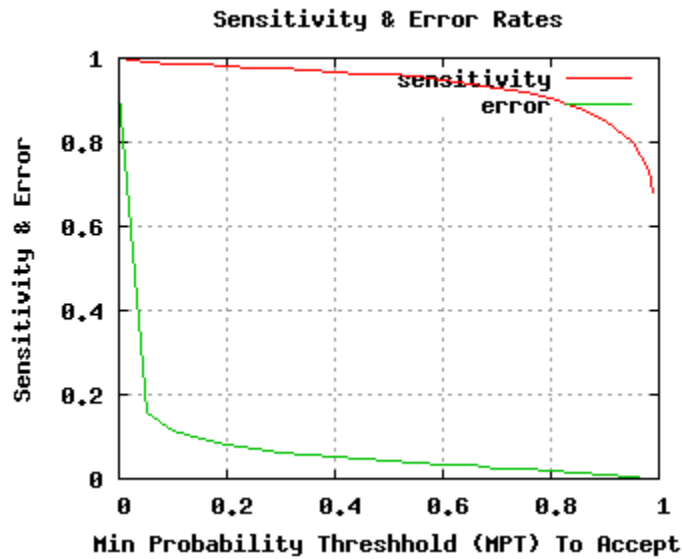

Pseudomonas GPF8: sensitivity & error rates plot

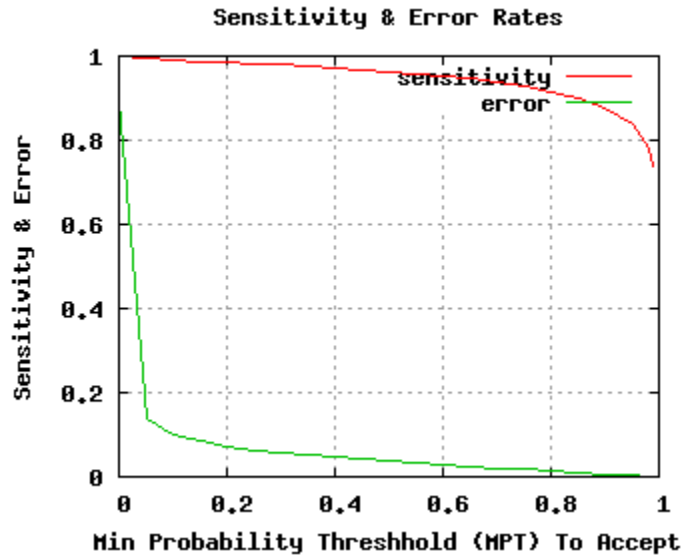

Plasma GPF8: sensitivity & error rates plot

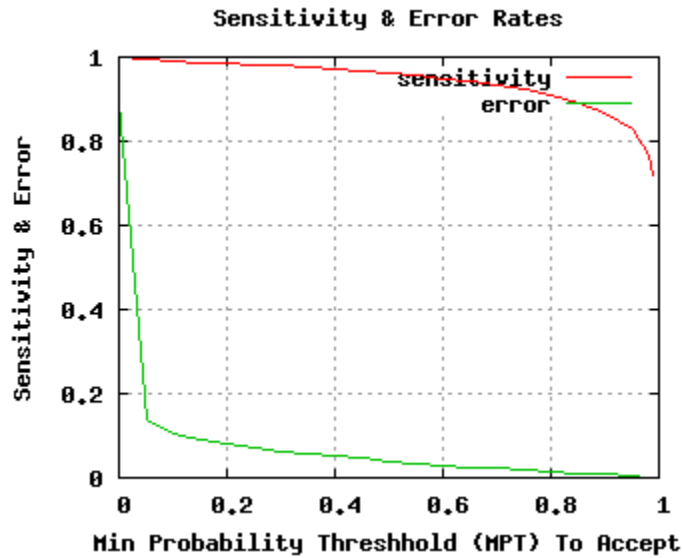

Supplement: NIHMS130161-supplement-4_si_004.pdf [file NIHMS130161-supplement-4_si_004.pdf]
